# Supplementary material
Source: publisher site journal article supplement (https://www.dovepress.com/get_supplementary_file.php?f=384705.docx)
Supplement: Supplementary file 1 [file get_supplementary_file.php]

**Supplementary Table 1** Main antidepressant medication prescribed at baseline

| Antidepressant | Sustained remission  (n=31) | Non-sustained remission  (n=46) | Total  (n=77) |
| --- | --- | --- | --- |
| *SSRI* |  |  |  |
| Sertraline | 13 (41.9%) | 14 (30.4%) | 27 (35.1%) |
| Escitalopram | 5 (16.1%) | 5 (10.9%) | 10 (13.0%) |
| Paroxetine | 1 (3.2%) | 1 (2.2%) | 2 (2.6%) |
| Fluvoxamine | 1 (3.2%) | 0 | 1 (1.3%) |
| *SNRI* |  |  |  |
| Duloxetine | 4 (12.9%) | 12 (26.1%) | 16 (20.8%) |
| Venlafaxine | 1 (3.2%) | 1 (2.2%) | 2 (2.6%) |
| Milnaciprane | 1 (3.2%) | 1 (2.2%) | 2 (2.6%) |
| *TCA* |  |  |  |
| Imipramine | 1 (3.2%) | 0 | 1 (1.3%) |
| Nortriptyline | 0 | 1 (2.2%) | 1 (1.3%) |
| Amoxiapine | 1 (3.2%) | 1 (2.2%) | 2 (2.6%) |
| *Others* |  |  |  |
| Miltazapine | 2 (6.5%) | 4 (8.7%) | 6 (7.8%) |
| Trazodone | 0 | 2 (4.3%) | 2 (2.6 %) |
| None | 1 (3.2%) | 4 (8.7%) | 5 (6.5%) |

**Abbreviations:** SSRI, Selective Serotonin Reuptake Inhibitor; SNRI, Serotonin Noradrenaline Reuptake Inhibitorser; TCA, tricyclic antidepressants

**Notes:** n (%). Sustained remission indicates remission at both 6- and 12-month assessments.

**Supplementary Table 2** Depression severity over time (n=77)

|  | Sustained Remission (n=31) | Non-Sustained Remission (n=46) | Total (n=77) |
| --- | --- | --- | --- |
| *GRID-HAMD17* |  |  |  |
| Baseline | 12.0 (6.6) | 16.1 (6.9) | 14.5 (7.0) |
| 6 months | 2.5 (2.3) | 13.6 (5.7) | 9.1 (7.1) |
| 12 months | 1.9 (2.0) | 12.0 (6.3) | 7.9 (7.0) |
| *BDI-II* |  |  |  |
| Baseline | 18.8 (10.7) | 27.4 (11.5) | 23.9 (11.9) |
| 6 months | 5.9 (5.9) | 19.5 (21.7) | 14.0 (18.3) |
| 12 months | 4.5 (7.1) | 21.9 (12.6) | 14.9 (13.7) |

**Abbreviations:** GRID-HAMD17, 17-item GRID-Hamilton Depression Rating Scale; BDI-II, Beck Depression Inventory-Second Edition

**Notes:** Mean (SD). Sustained remission indicates remission at both 6- and 12-month assessments.

**Supplementary Figure 1** Change in depression severity based on the mean score of CGI-S over 12 months

**Abbreviations:** SR, sustained remission; CGI, Clinical Grobal Impressions.

**Notes:** Sustained remission indicates remission at both 6- and 12-month assessments. Error bars indicate SDs.

**Supplementary Table 3** Correlations between T&P constructs and depression severity over time

|  | T&P rejection sensitivity | T&P personal reserve |
| --- | --- | --- |
| GRID-HAMD17 at baseline | 0.37* | 0.10 |
| GRID-HAMD17 at 6 months | 0.40* | 0.40* |
| GRID-HAMD17 at 12 months | 0.23* | 0.30* |

*p < 0.05

**Abbreviations:** GRID-HAMD17, 17-item GRID-Hamilton Depression Rating Scale; T&P, Temperament and Personality Questionnaire

**Notes:** Weak-to-moderate correlations were found between T&P rejection sensitivity and GRID-HAMD17 scores at each time point. T&P personal reserve correlated with GRID-HAMD17 at 6 and 12 months, however, this correlation was not found at baseline.
